# Supplementary material
Source: PubMed Central journal article supplement (PMC11160507)
Supplement: NIHMS1994468-supplement-11.pdf [file NIHMS1994468-supplement-11.pdf]

1252

1253

1254

## Supplementary Materials for

1255 **Transcriptomes and metabolism define mouse and human MAIT cell populations**

1256 Shilpi Chandra<sup>1,2,†,\*</sup>, Gabriel Ascui<sup>1,2,3,†</sup>, Thomas Riffelmacher<sup>1,2,4,†</sup>, Ashu Chawla<sup>5</sup>, Ciro

1257 Ramírez-Suástegui<sup>1,6</sup>, Viankail C. Castelan<sup>1,2</sup>, Gregory Seumois<sup>1,6</sup>, Hayley Simon<sup>1,6</sup>,

1258 Mallory P. Murray<sup>1,2</sup>, Goo-Young Seo<sup>1,2</sup>, Ashmitaa L. R. Premal<sup>5</sup>, Benjamin Schmiedel<sup>1,6</sup>,

1259 Greet Verstichel<sup>1,6</sup>, Yingcong Li<sup>1,2,7</sup>, Chia-Hao Lin<sup>7</sup>, Jason Greenbaum<sup>5</sup>, John Lamberti<sup>8,9</sup>,

1260 Raghav Murthy<sup>8,10</sup>, John Nigro<sup>8</sup>, Hilde Cheroutre<sup>1,6</sup>, Christian H. Ottensmeier<sup>11</sup>, Stephen

1261 M. Hedrick<sup>7,12</sup>, Li-Fan Lu<sup>7,13,14</sup>, Pandurangan Vijayanand<sup>1,6</sup> and Mitchell Kronenberg<sup>1,2,7,\*</sup>

1262

1263 This PDF file includes:

1264

1265 Supplementary Figures S1 to S10

1266

1267 Table S1 to S10

1268

1269

1270

1271

1272

1273

1274

1275

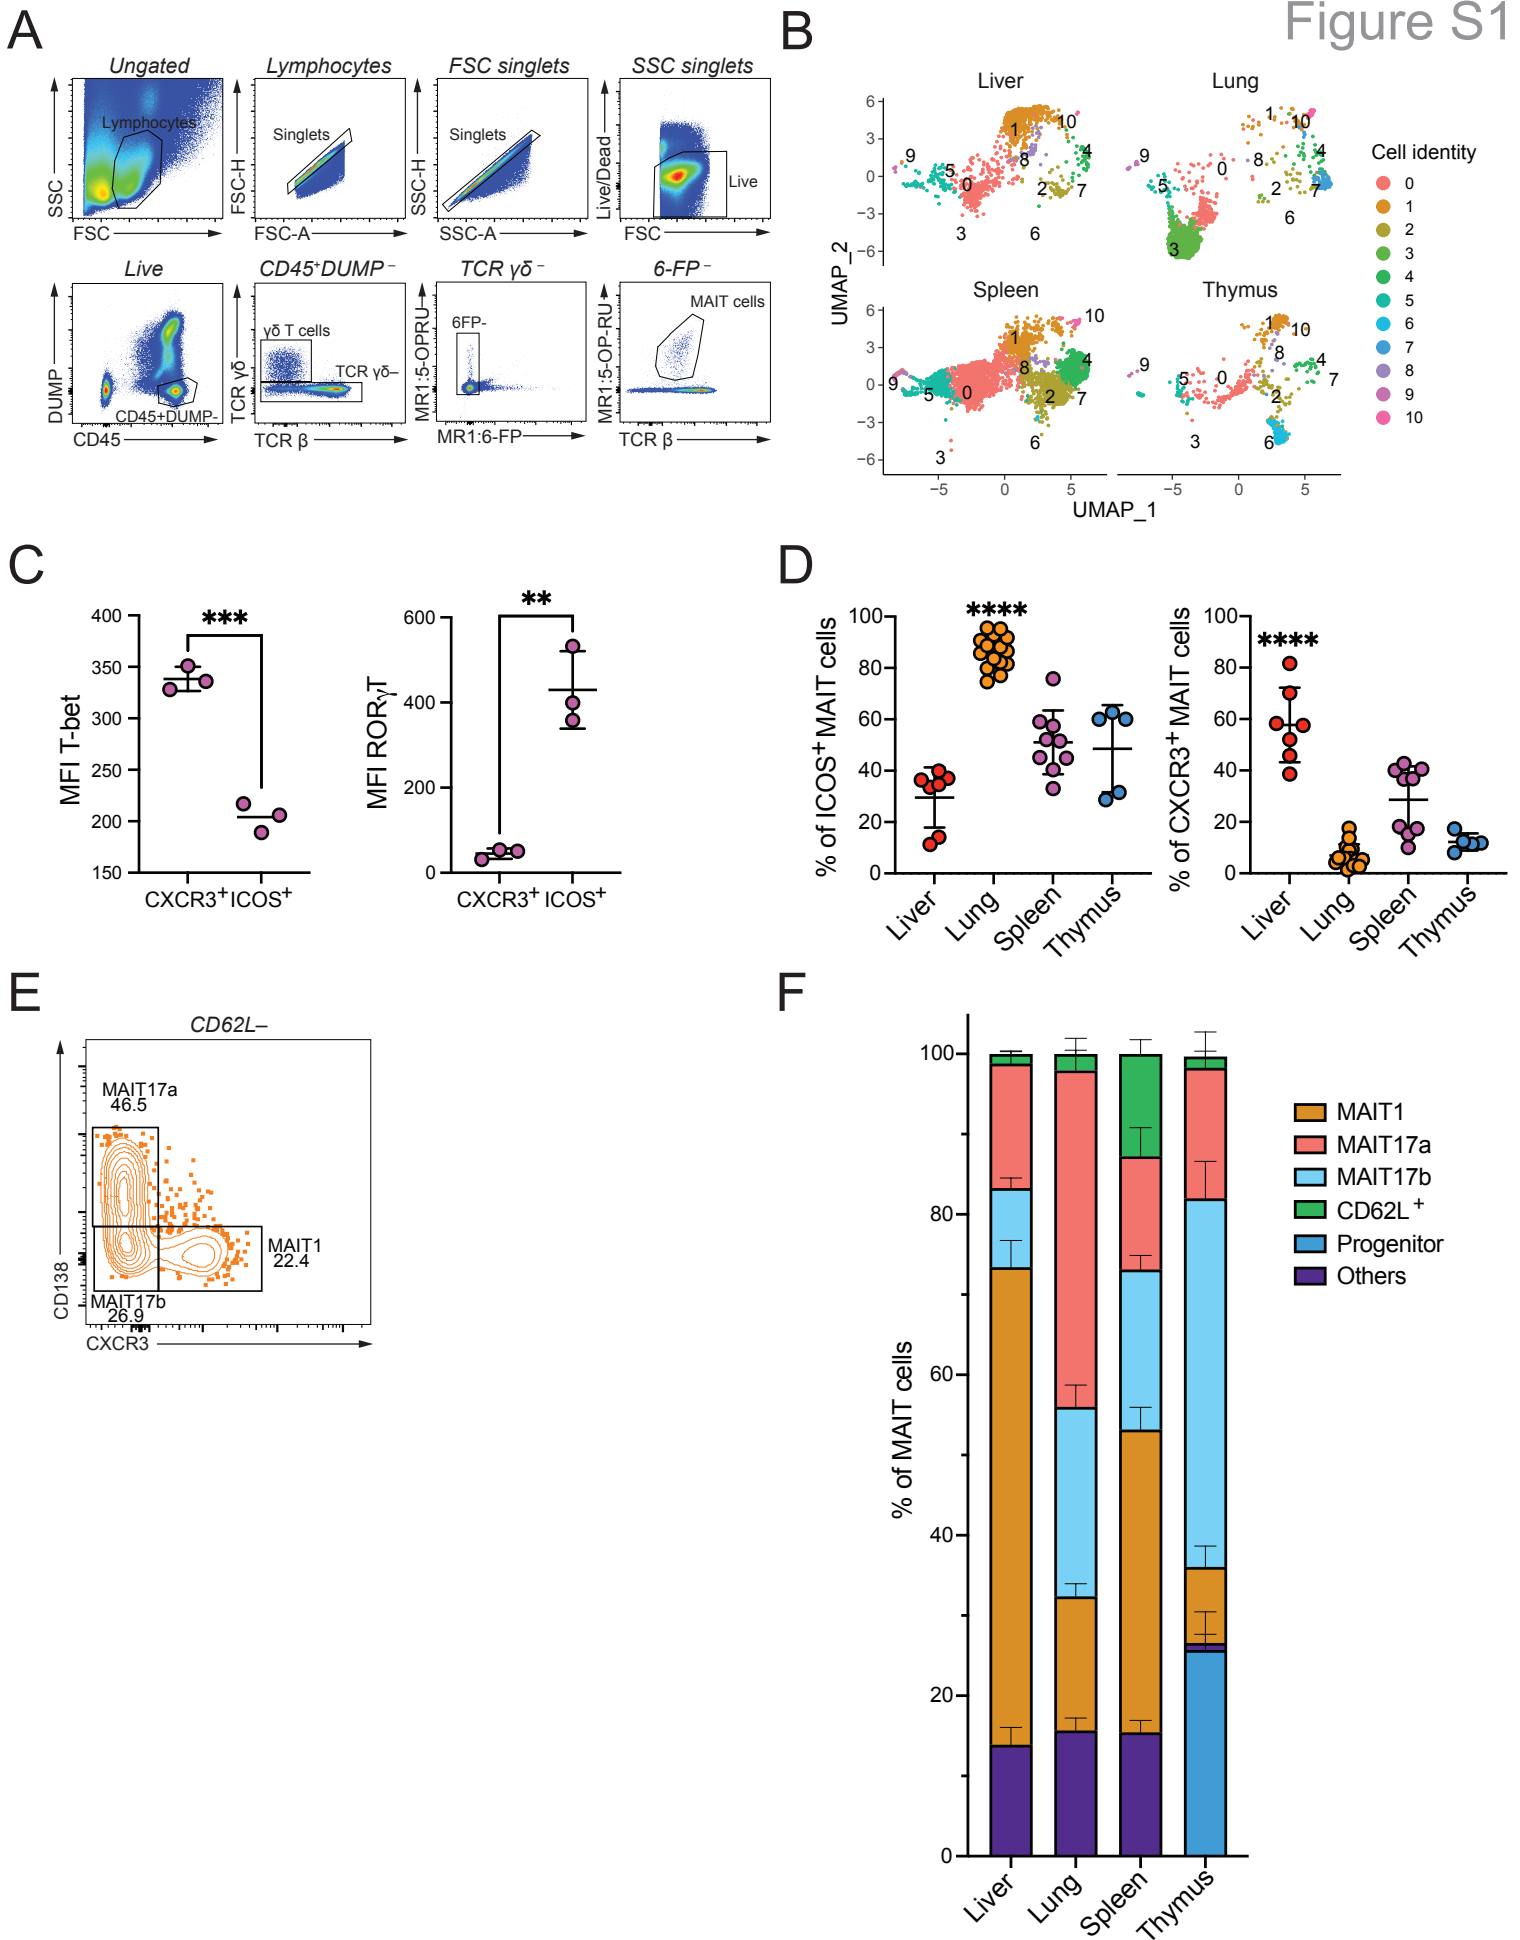

1276 **Figure S1: Characterization of mouse MAIT cell subsets**

1277 (A) Representative flow cytometry gating identified mouse lung MAIT cells, used for other  
1278 tissues as well. Live/Dead Yellow negative single cell events were gated by excluding  
1279 antigen-presenting cells (DUMP: CD11c, CD11b, IgD, B220) and  $\gamma\delta$  T cells from the  
1280 CD45<sup>+</sup> population, CD4<sup>+</sup>, CD8<sup>+</sup> double positive cells were excluded as well. The majority  
1281 of experiments did not include a 6-FP loaded control, indicated when used. (B) UMAP  
1282 plot showing the degree to which MAIT cell clusters are composed of cells from the  
1283 indicated mouse tissues. Each cluster has the same UMAP coordinates as in Fig. 1A. (C)  
1284 MFI indicating expression of T-bet and ROR $\gamma$ T transcription factors in spleen MAIT cell  
1285 subpopulations defined as CXCR3<sup>+</sup> and ICOS<sup>+</sup>. Paired t-test. n = 3. \*: p < 0.05; \*\*: p <  
1286 0.01; (D) Frequency of ICOS<sup>+</sup> and CXCR3<sup>+</sup> MAIT cells in the indicated tissues. One-way  
1287 ANOVA with post-hoc Tukey test. Liver n = 7, Lung n= 15, Spleen n= 9, Thymus n= 5.  
1288 \*\*\*\*: adjusted p < 0.0001. (E) Lung MAIT cell subpopulations were detected by flow  
1289 cytometry according to markers for MAIT cell clusters determined by scRNA-seq. The  
1290 total MAIT cell gate was initially separated by CD62L expression. The CD62L negative  
1291 gate was further divided into MAIT17a (ICOS<sup>+</sup>CD138<sup>+</sup>CXCR3<sup>-</sup>), MAIT17b (ICOS<sup>+</sup>CD138<sup>-</sup>  
1292 CXCR3<sup>-</sup>) or MAIT1 (ICOS<sup>-</sup>CD138<sup>-</sup>CXCR3<sup>+</sup>). (F) Percentage of each MAIT cell  
1293 subpopulation, as defined above, in different tissues. Using the global gating strategy  
1294 defined in (E) in combination with thymus-specific markers to detect immature MAIT cells  
1295 (CD44<sup>-</sup>CD24<sup>+</sup>CCR9<sup>+</sup>LEF1<sup>+</sup>SATB1<sup>+</sup>), the proportion of MAIT cell subpopulations was  
1296 determined for each tissue combined from 11 female C57BL/6 mice (12.3 $\pm$ 6.1 weeks-  
1297 old). Data from 5 additional thymus tissues also were included.

1298

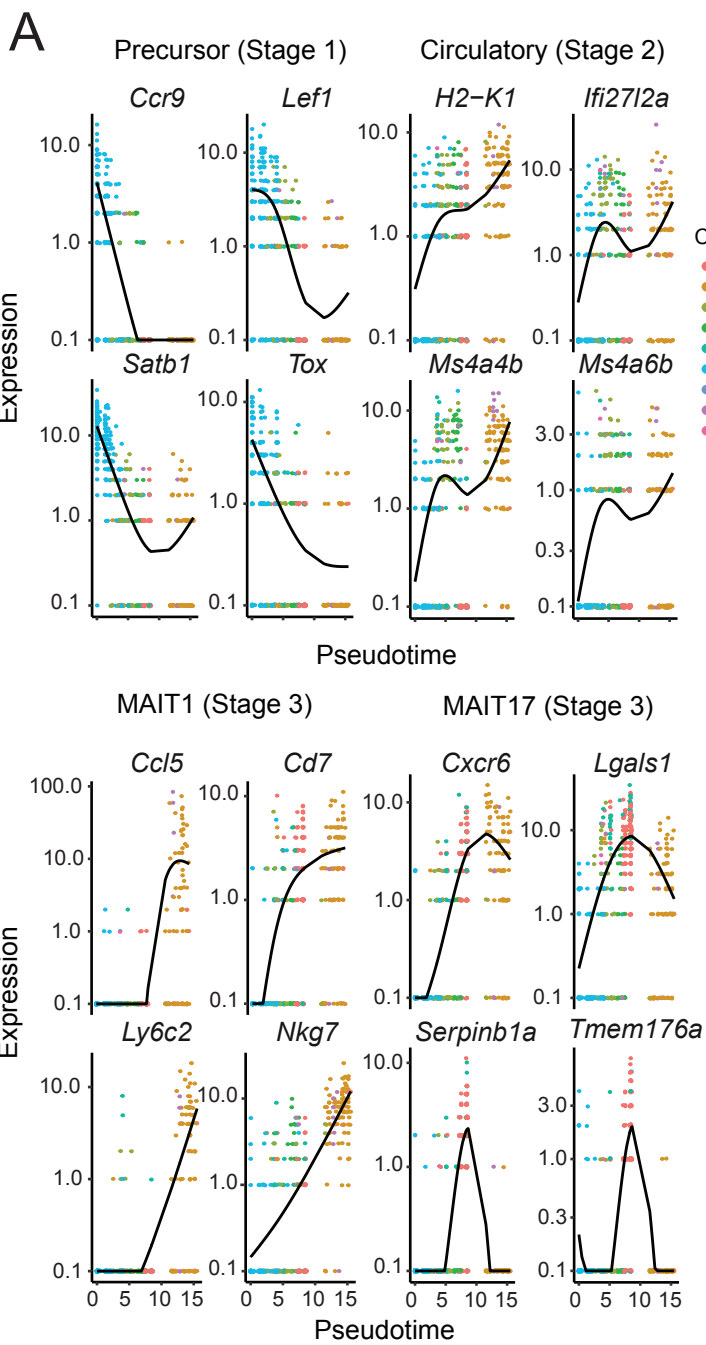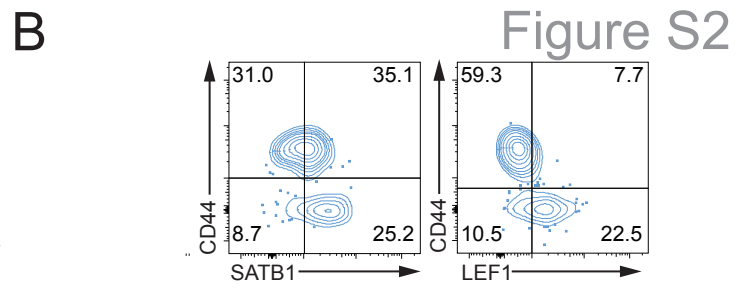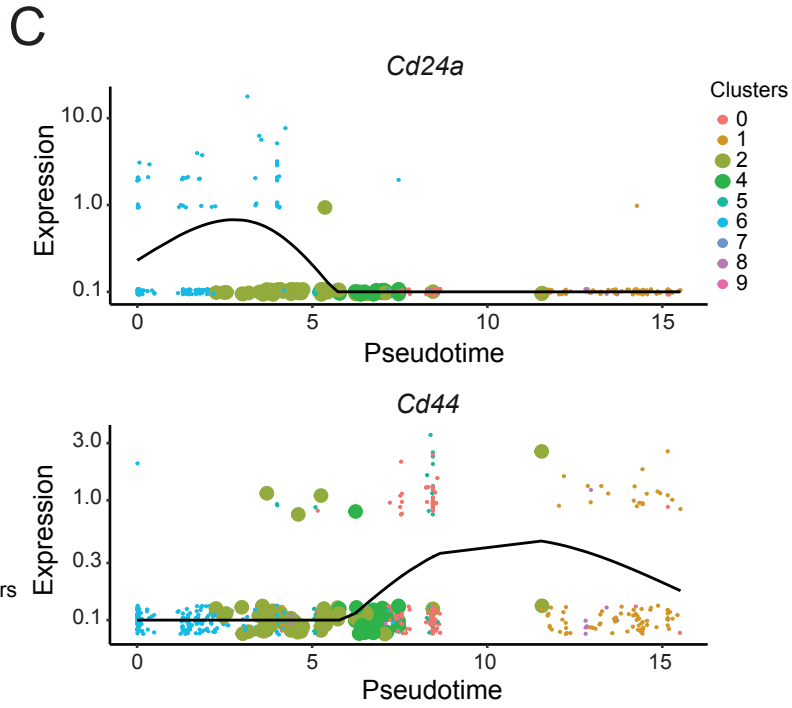

1299 **Figure S2: Transcriptional signatures reveal different stages of thymus MAIT cell**  
1300 **differentiation**

1301 (A) Expression of the indicated stage-specific genes along the pseudotime trajectory as  
1302 constructed by Monocle 3. (B) Representative flow cytometry plots for staining of gated,  
1303 thymus MAIT cells for surface expression of CD44 compared to intracellular SATB1 or  
1304 LEF1, n = 5, from 2 experiments. (C) Expression of *Cd24a* and *Cd44* along the  
1305 pseudotime trajectory for MAIT thymus cells as constructed by Monocle 3.

1306

1307

1308

1309

1310

1311

1312

1313

1314

1315

1316

1317

1318

1319

1320

1321

A

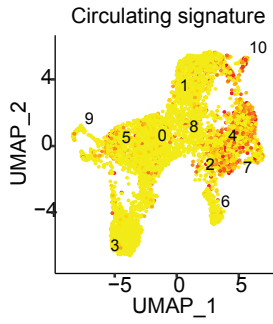

B

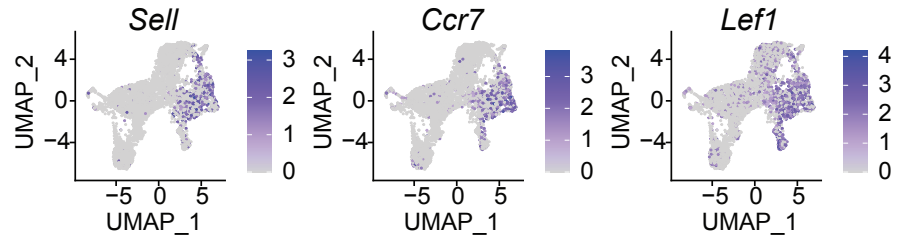

C

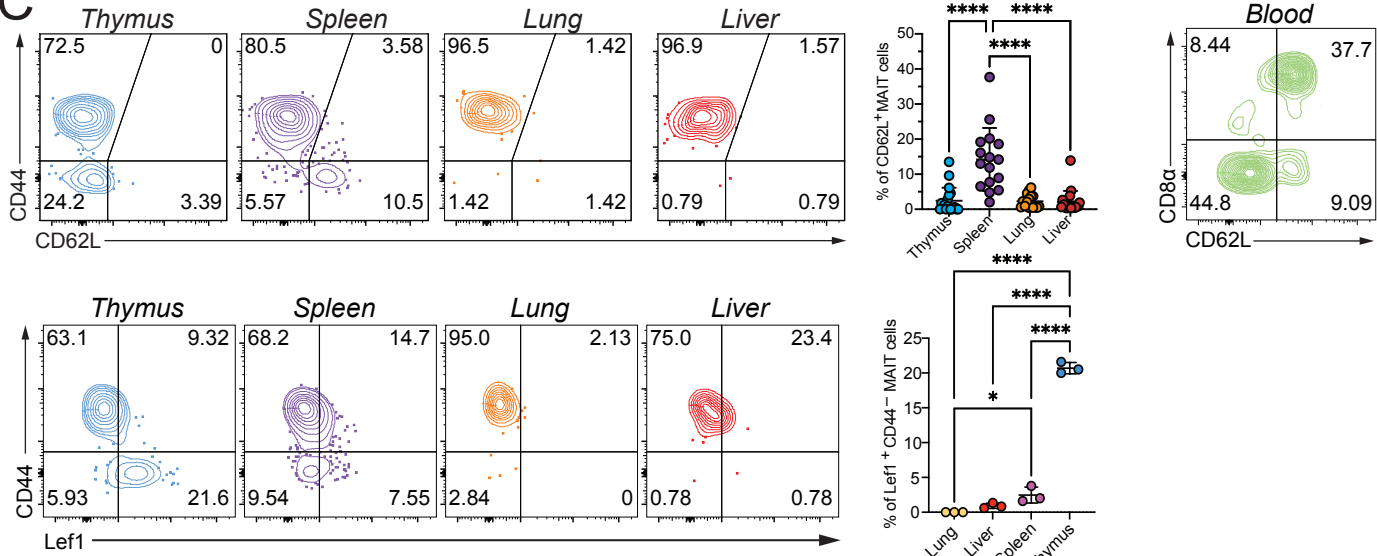

D

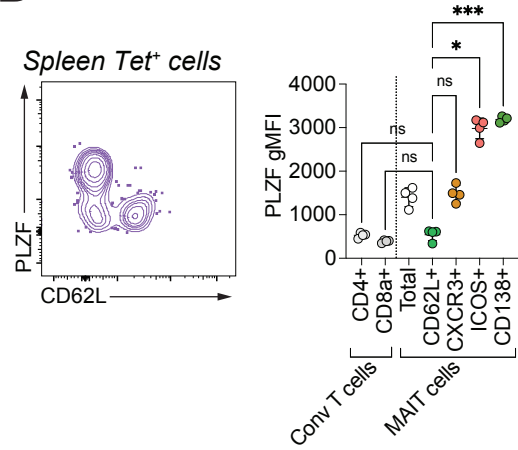

E

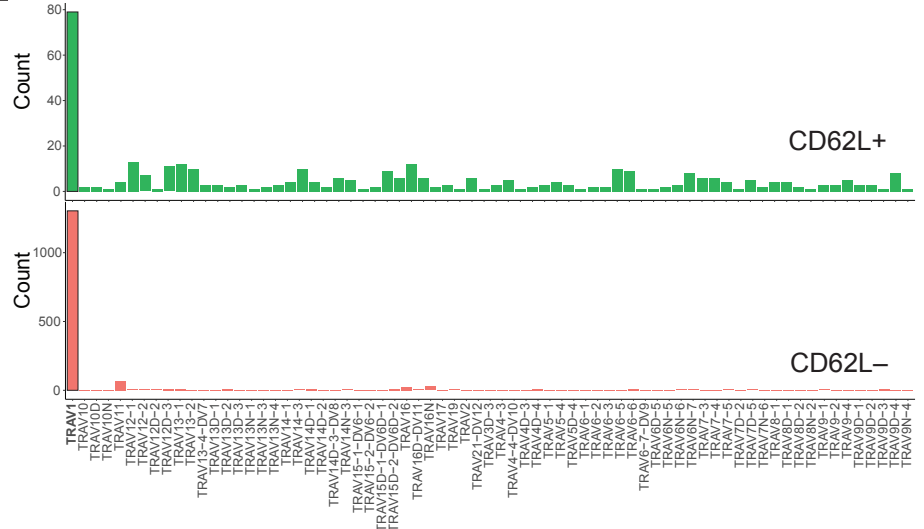

F

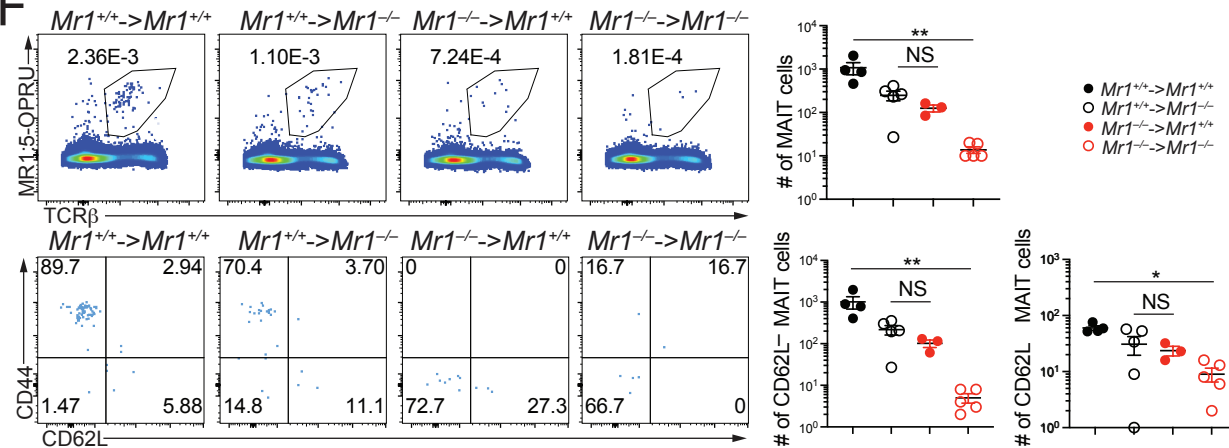

1322 **Figure S3: CD62L<sup>+</sup> mouse MAIT cell function and origin**

1323 (A) UMAP showing the circulatory gene expression signature scores from scRNA-seq data  
1324 from mouse MAIT cells combined from liver, lung, spleen and thymus. (B) UMAP feature  
1325 plots showing expression of key genes in MAIT cells combined from the four organs. (C)  
1326 Representative plots showing CD44 and CD62L and Lef1 by MAIT cells from liver, lung,  
1327 spleen and thymus. One-way ANOVA with post-hoc Tukey test. n = 4. \*\*\*\*: adjusted p-  
1328 value < 0.0001. (D) Representative plot of CD62L and PLZF expressed by mouse spleen  
1329 MAIT cells (top). Mean fluorescent intensity of PLZF expressed by mouse spleen CD4,  
1330 CD8, and MAIT cell subsets. Paired one-way ANOVA with post-hoc Bonferroni test. n =  
1331 3. \*\*\*: adjusted p-value < 0.001, \*: adjusted p-value < 0.05. (E) Number of cells expressing  
1332 specific *Tcra* genes detected by scRNA-seq of sorted mouse CD62L<sup>+</sup> and CD62L<sup>-</sup> spleen  
1333 MAIT cells. Representative of 2 experiments (Total of 1896 and 441 cells for CD62L<sup>-</sup> and  
1334 CD62L<sup>+</sup> MAIT cells, respectively). (E) Mouse CD62L<sup>+</sup> and CD62L<sup>-</sup> spleen MAIT cells  
1335 were isolated by cell sorting and cultured with anti-CD3/CD28 beads or stimulated with 5-  
1336 OP-RU. *Left*: T-bet and ROR $\gamma$ T expression were evaluated by flow cytometry of TCR $\beta$ <sup>+</sup>  
1337 mMR1:5-OP-RU<sup>+</sup> MAIT cells. *Right*: Cultured MAIT cells were re-stimulated briefly with  
1338 PMA and Ionomycin before intracellular were measured. Representative of 2  
1339 experiments. (F) (*top*) Number of MAIT cells in the indicated chimeric mice. Donor BM  
1340 cells were from *Mr1*<sup>+/+</sup> mice (black symbols) or *Mr1*<sup>-/-</sup> mice (red symbols); recipients were  
1341 *Mr1*<sup>+/+</sup> (filled circles) or *Mr1*<sup>-/-</sup> mice (open circles). Thymus tissues were harvested after 8  
1342 weeks and analyzed by flow cytometry for MR1-tetramer binding cells. (*bottom*)  
1343 Expression of CD44 and CD62L on MR1 tetramer-binding spleen cells from chimeric  
1344 mice. Absolute numbers of CD62L<sup>+</sup> and CD62L<sup>-</sup> tetramer-binding spleen cells are shown.

1345 Data analyzed by Kruskal-Wallis with Tukey post-test for multiple comparisons, displayed as  
1346 mean  $\pm$  SEM, NS:  $P \geq 0.05$ .

1347

1348

1349

1350

1351

1352

1353

1354

1355

1356

1357

1358

1359

1360

1361

1362

1363

1364

1365

1366

1367



A

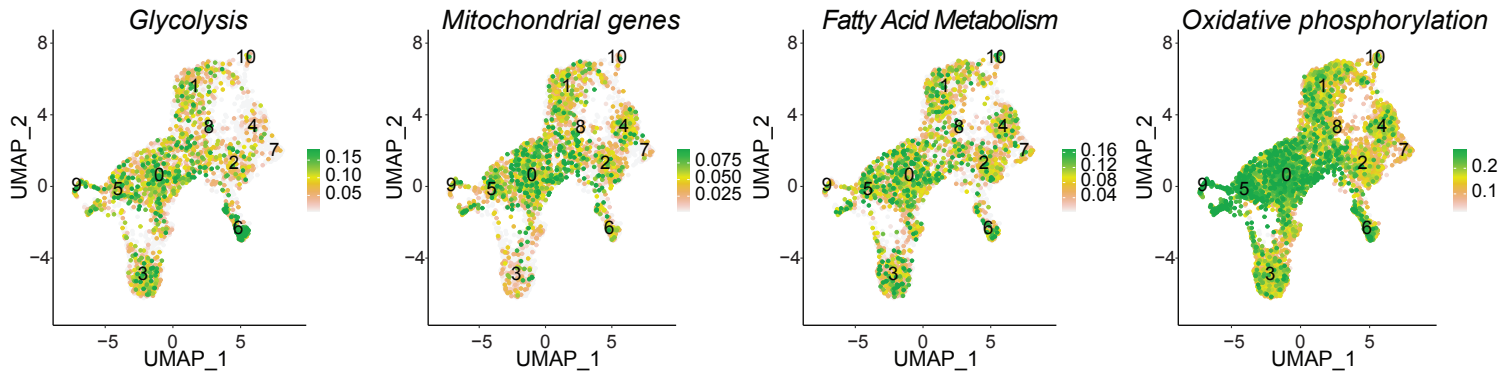

B

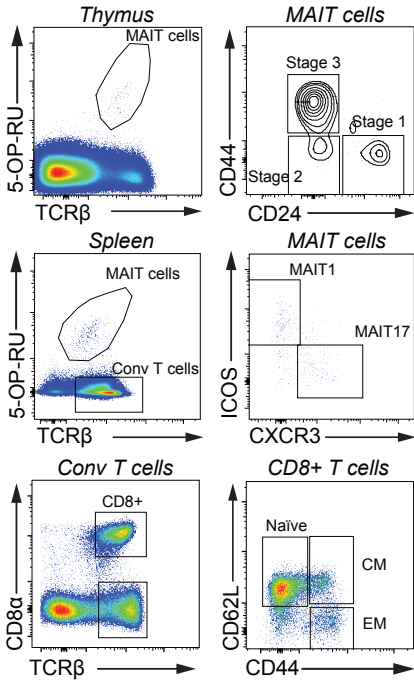

C

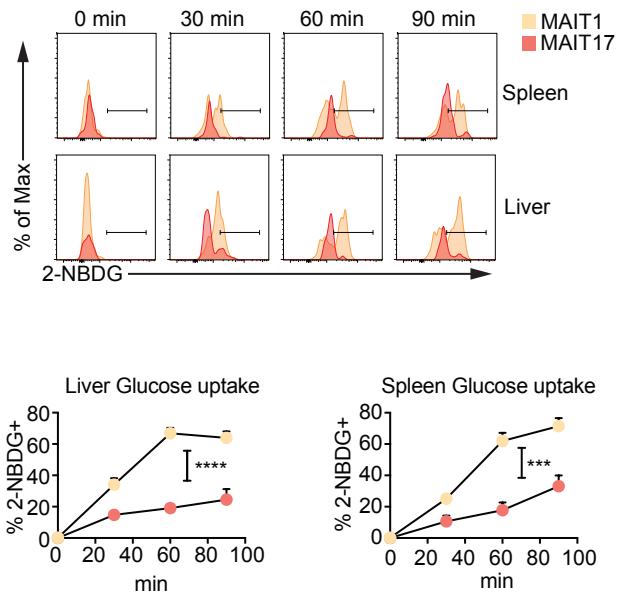

1368 **Figure S4: Different metabolic signatures of mouse MAIT cell subsets**  
1369 (A) UMAP of scRNA-seq data showing oxidative phosphorylation, mitochondrial gene, fatty  
1370 acid metabolism and glycolysis signature scores for MAIT cells combined from thymus,  
1371 spleen, liver and lung. (B) Gating strategy for subsets of mouse thymic (*top*) MAIT cells,  
1372 splenic MAIT cells (*middle*) and conventional (conv) CD8<sup>+</sup> T cells (*bottom*). Spleen TCRβ<sup>+</sup>  
1373 CD8α<sup>+</sup> T cells, excluding MAIT cells, were subdivided into naïve, central memory (CM) and  
1374 effector memory (EM) subsets based on expression of CD62L and CD44. (C) MAIT cells  
1375 were isolated from indicated tissues and kinetics of fluorescent glucose analog (2-NBDG)  
1376 uptake in CXCR3<sup>+</sup> (MAIT1, yellow) and ICOS<sup>+</sup> (MAIT17, red) cell subsets were quantified;  
1377 representative histograms of either Spleen (*top*) or Liver (*bottom*) MAIT cells for 2-NBDG  
1378 uptake and dynamic quantification for both tissues (*bottom-left*, Liver; *bottom-right*, Spleen).  
1379 Timepoints represent technical replicates from 8 pooled mice. Data analyzed by 2-way  
1380 ANOVA with Geisser-Greenhouse correction, displayed as mean ± SEM, \*\*\**P*<0.001 and  
1381 \*\*\*\**P*<0.0001.

1382

1383

1384

1385

1386

1387

1388

1389

1390

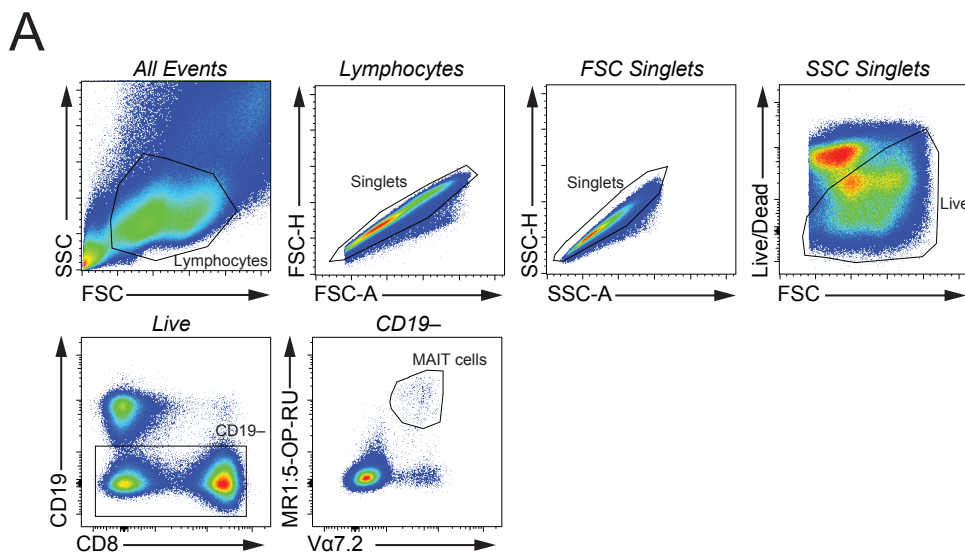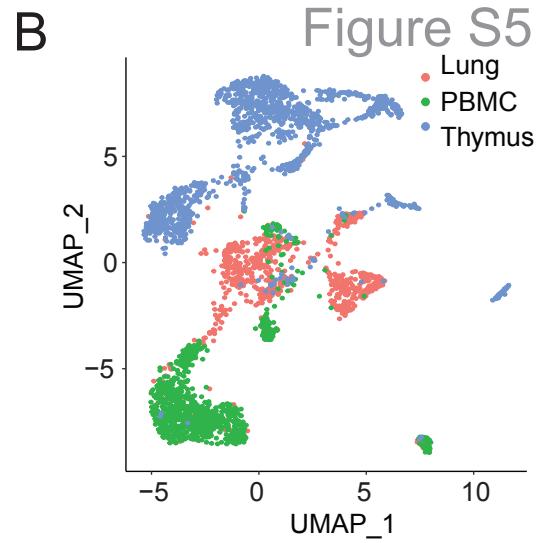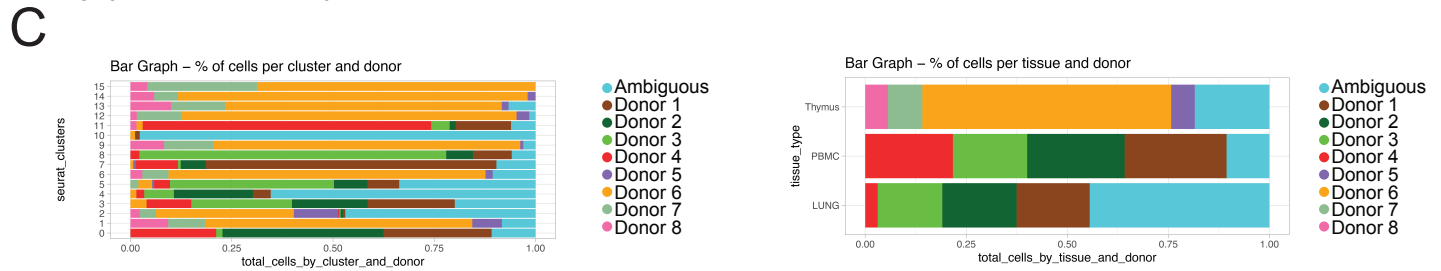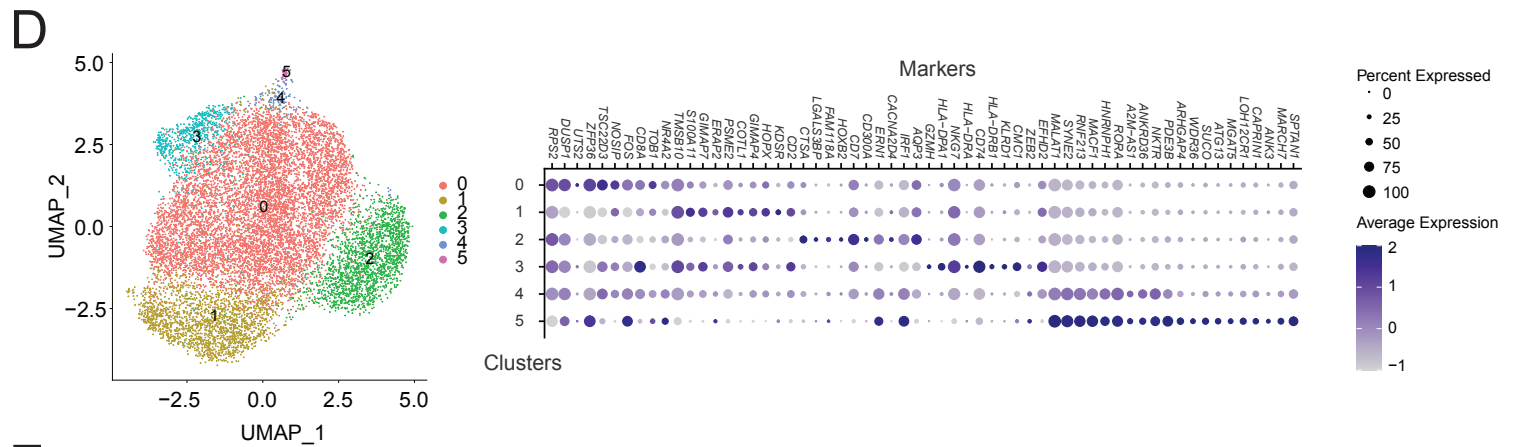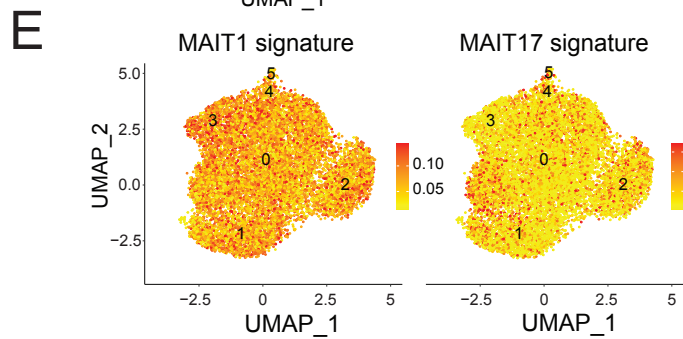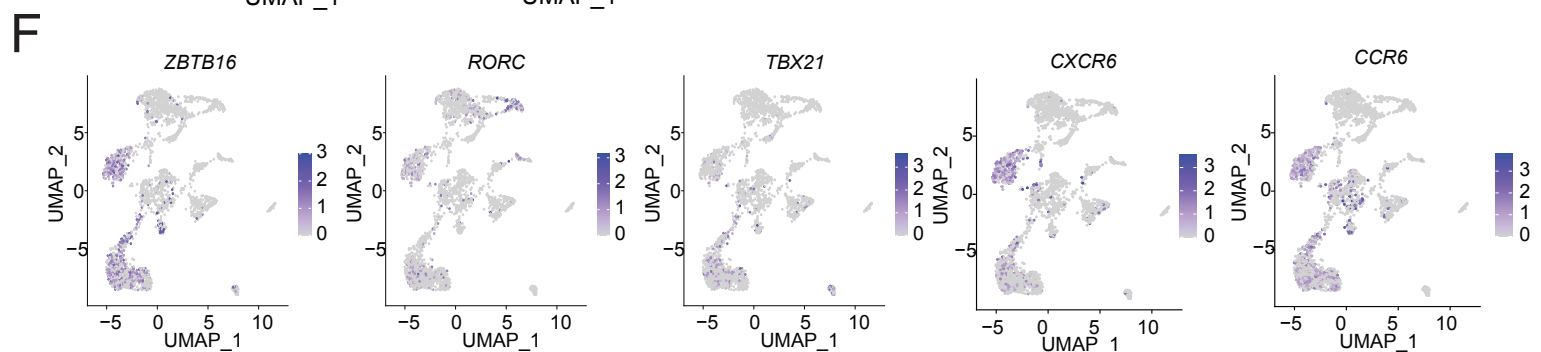

1391 **Figure S5: Human tissues have a distinct transcriptional signatures**  
1392 (A) Representative flow cytometry gating to identify human MAIT cells in different tissues.  
1393 Live/Dead Yellow negative single cell events were gated by excluding B cells (CD19<sup>+</sup>).  
1394 MAIT cells were identified as V $\alpha$ 7.2 TCR<sup>+</sup> and 5-OP-RU human MR1 tetramer<sup>+</sup> cells. (B)  
1395 UMAP plots representing human MAIT cells colored by their origin from different tissues. (C)  
1396 Bar graph indicating percentage of contributed by individual donors to the different MAIT cell  
1397 clusters (*left*) and to MAIT cells in the different tissues (*right*). (D) Transcriptomic analysis of  
1398 human MAIT cells from PMBCs from normal healthy donors. (*right*) UMAP plots were  
1399 generated by combining cells from six individuals; (*left*) Dot plot showing top 5 positive marker  
1400 genes in each cluster. (E) Score of MAIT1 or MAIT17 gene signatures from human PBMCs  
1401 from normal donors. (F) UMAP plot of expression of *ZBTB16*, *RORC*, *TBX21*, *CXCR6* and  
1402 *CCR6* by human MAIT cells combined from the different tissues.

1403

1404

1405

1406

1407

1408

1409

1410

1411

1412

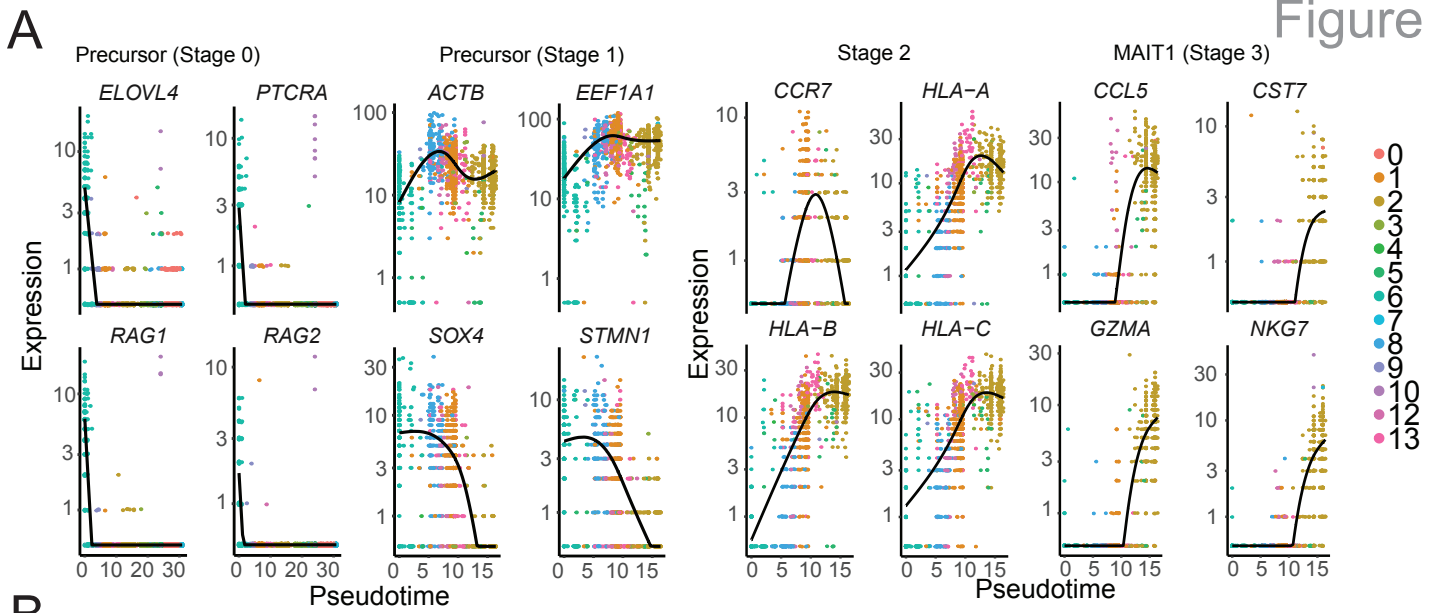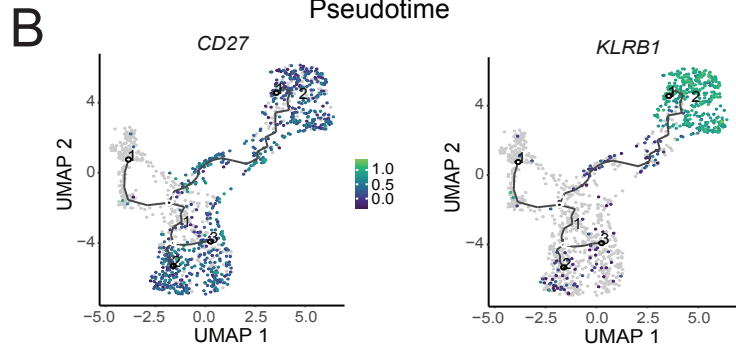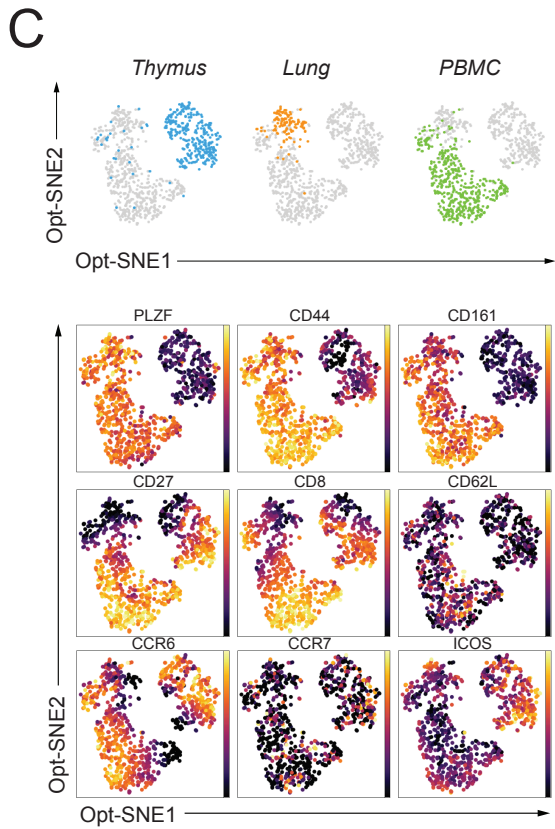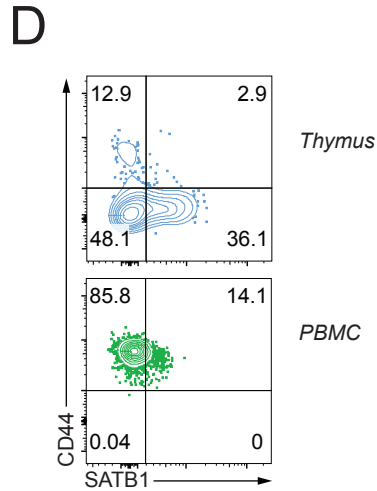

1413 **Figure S6: Transcriptional signatures reflected different stages of MAIT cell**  
1414 **development in human thymus**

1415 (A) Expression of the indicated stage-specific genes along the pseudotime trajectory as  
1416 constructed by Monocle 3. (B) Expression of *CD27* and *KLRB1* by MAIT cells from human  
1417 thymus with a Monocle 3 trajectory analysis. (C) Human thymus, lung and blood tissue  
1418 were processed for flow cytometry analysis. Human MAIT cells were detected as  $V\alpha 7.2+$   
1419  $hMR1:5-OP-RU+$  cells, as in Fig. S5A. Dimensional reduction was performed using Opt-  
1420 SNE algorithm using the OMIQ software, considering either surface makers candidates  
1421 or characteristics transcription factors identified by single cell RNA-seq. Representative  
1422 of 2 experiments. (D) Expression of *SATB1* and *CD44* by human thymic MAIT cells (*top*)  
1423 and MAIT cells in PMBCs (*bottom*). Representative of 2 experiments.

1424

1425

1426

1427

1428

1429

1430

1431

1432

1433

1434

1435

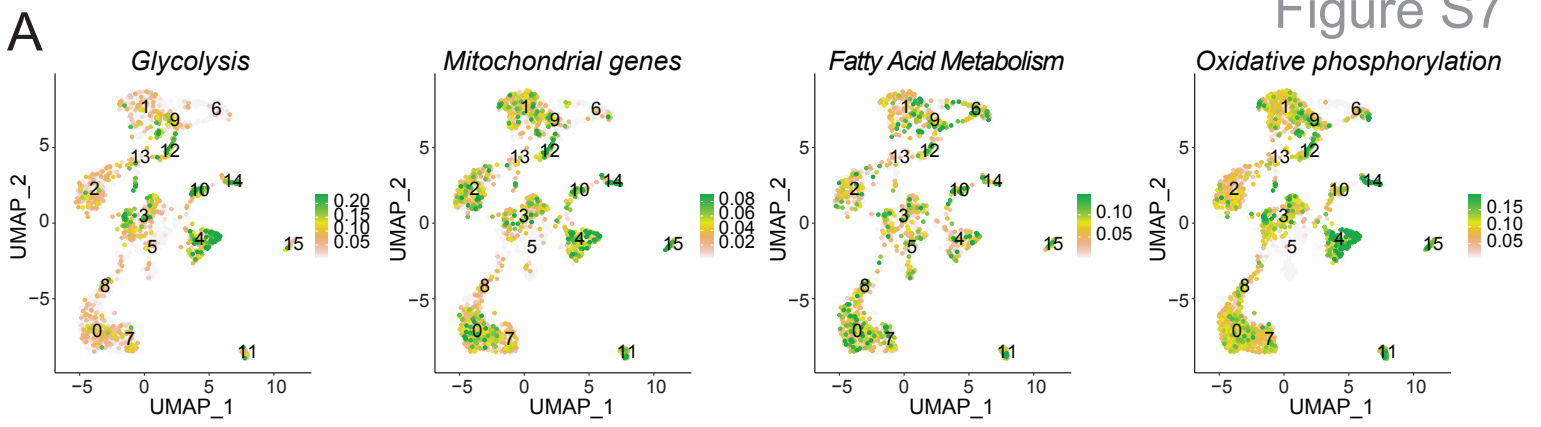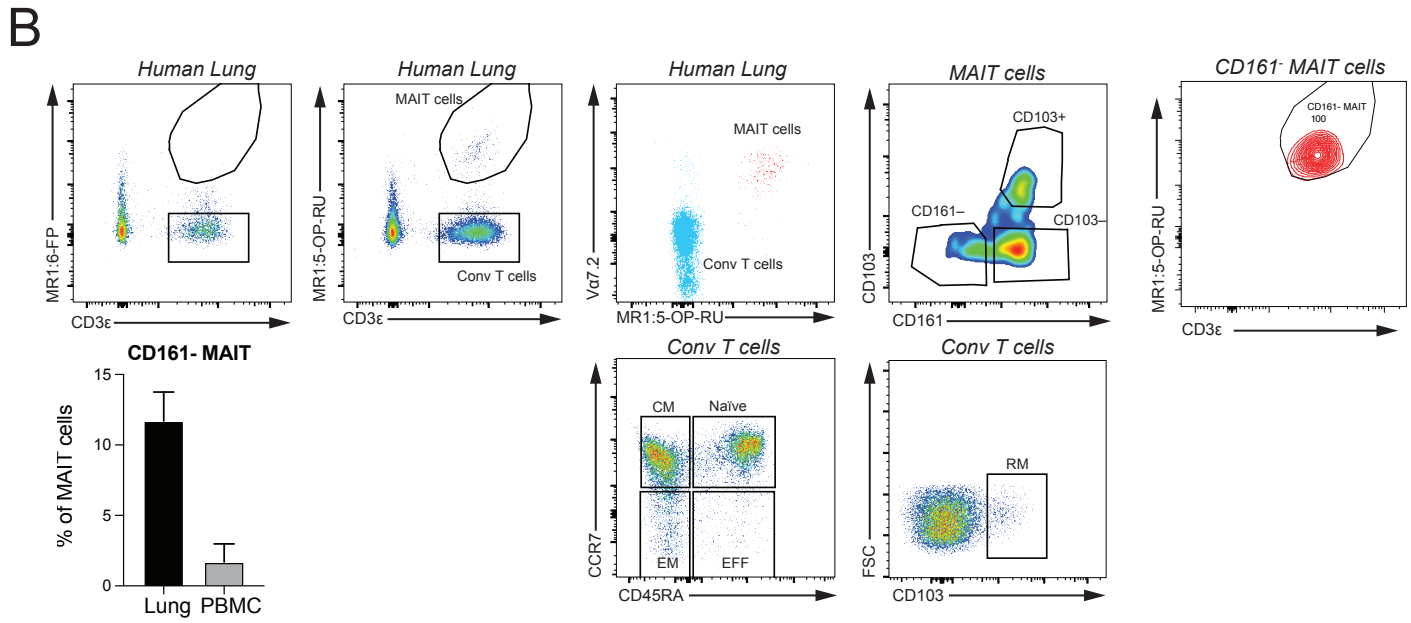

1436 **Figure S7: Metabolic signature of human MAIT cells.**

1437 (A) UMAP showing the oxidative phosphorylation, mitochondrial genes, fatty acid  
1438 metabolism and glycolysis signature scores for human MAIT cells combined from the four  
1439 tissues. (B) Cells were isolated from human lung biopsies and stained with non-specific  
1440 tetramer control MR1 loaded with 6FP (*left*) or 5-OP-RU loaded MR1 tetramer to identify  
1441 MAIT cells (*right*). CD3<sup>+</sup> 5-OP-RU-tetramer<sup>+</sup> MAIT cells were further tested for V $\alpha$ 7.2 TCR  
1442 and subdivided into three subsets based on expression of CD161 and CD103, as shown.  
1443 TCR $\beta$ <sup>+</sup> CD8<sup>+</sup> T cells excluding MAIT cells were subdivided into naïve, central memory (CM),  
1444 effector memory (EM) and resident memory (RM) subsets based on expression of CD45RA,  
1445 CCR7 and CD103. On right, percentage of CD161<sup>-</sup> cells are shown in lung and PBMCs.

1446

1447

1448

1449

1450

1451

1452

1453

1454

1455

1456

1457

1458



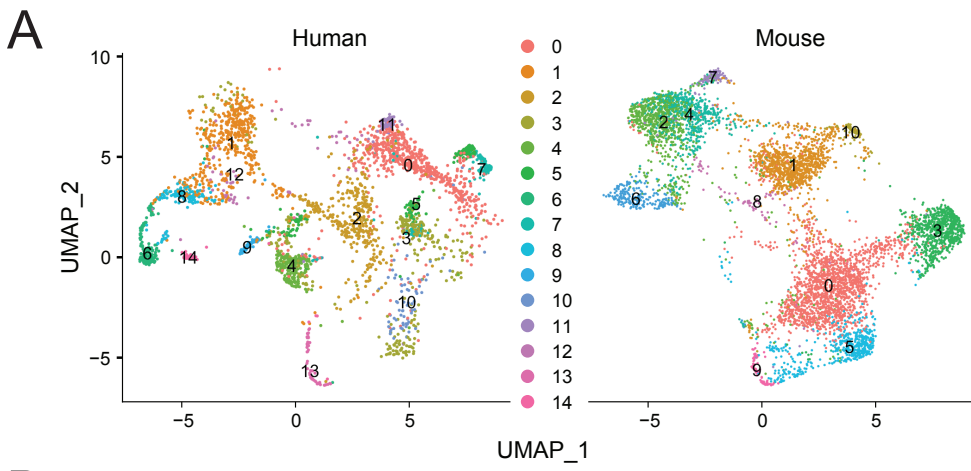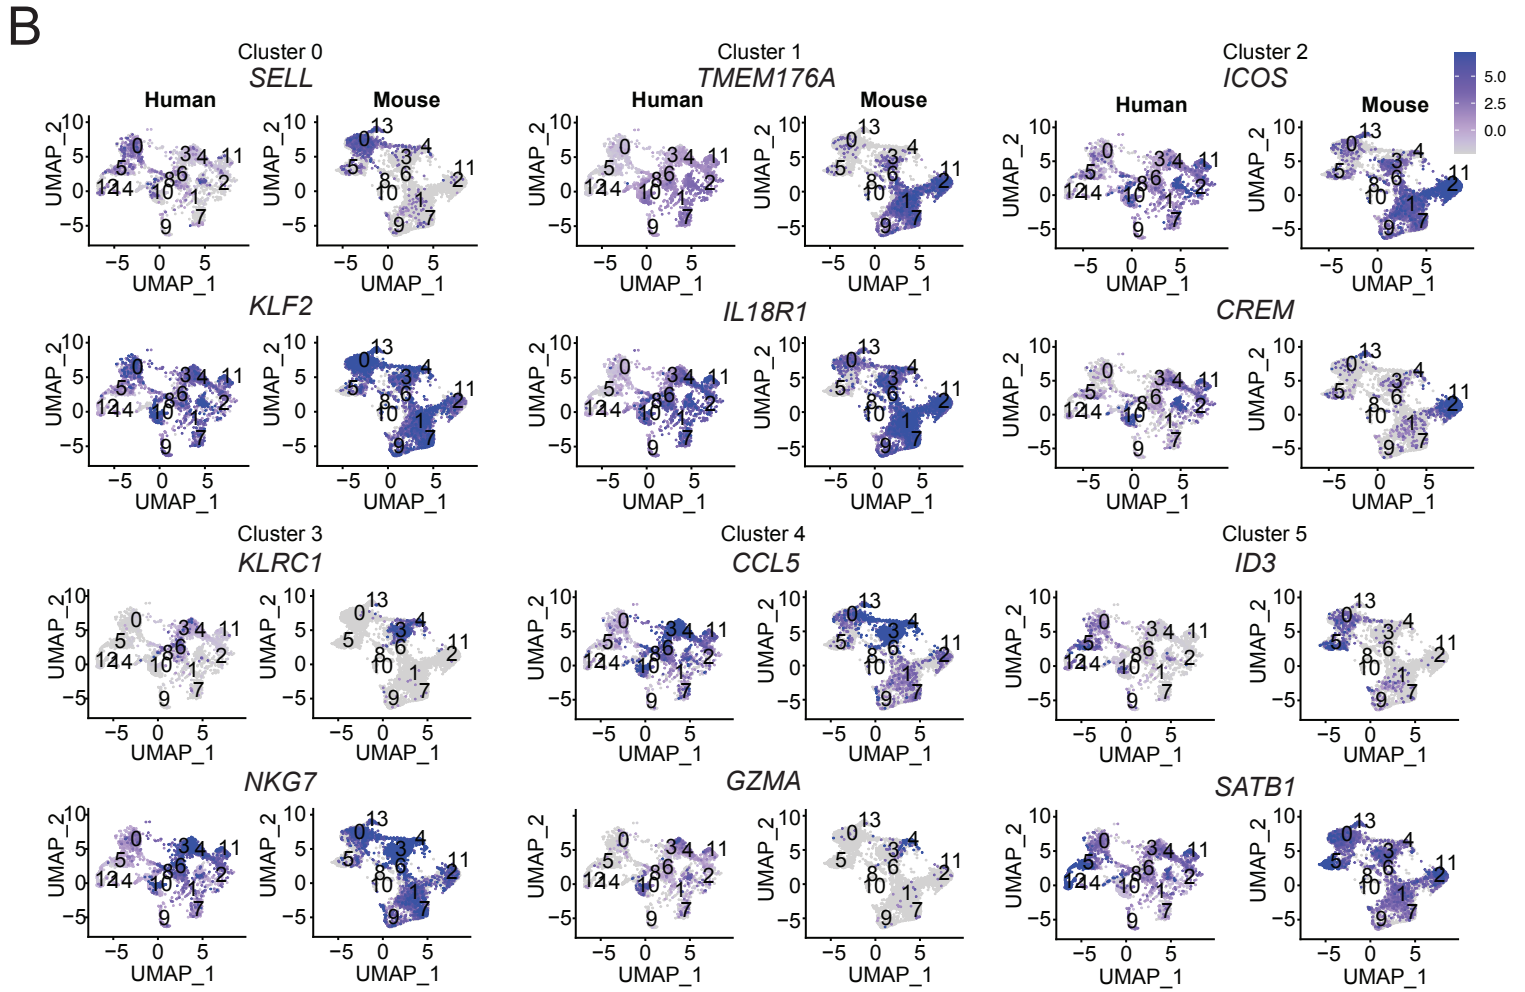

1459 **Figure S8: Integration of human and mouse MAIT cell datasets.**

1460 (A) Integrated UMAP of mouse and human MAIT cells showing clusters of cells with same  
1461 coordinates as in the Fig 7A. Cells are labeled according to the cluster numbers in Fig 5  
1462 A (human) and Fig 1A (mouse). (B) UMAPs showing expression by human and mouse  
1463 MAIT cells of the top two marker genes of the indicated *i*-clusters.

1464

1465

1466

1467

1468

1469

1470

1471

1472

1473

1474

1475

1476

1477

1478

1479

1480

1481

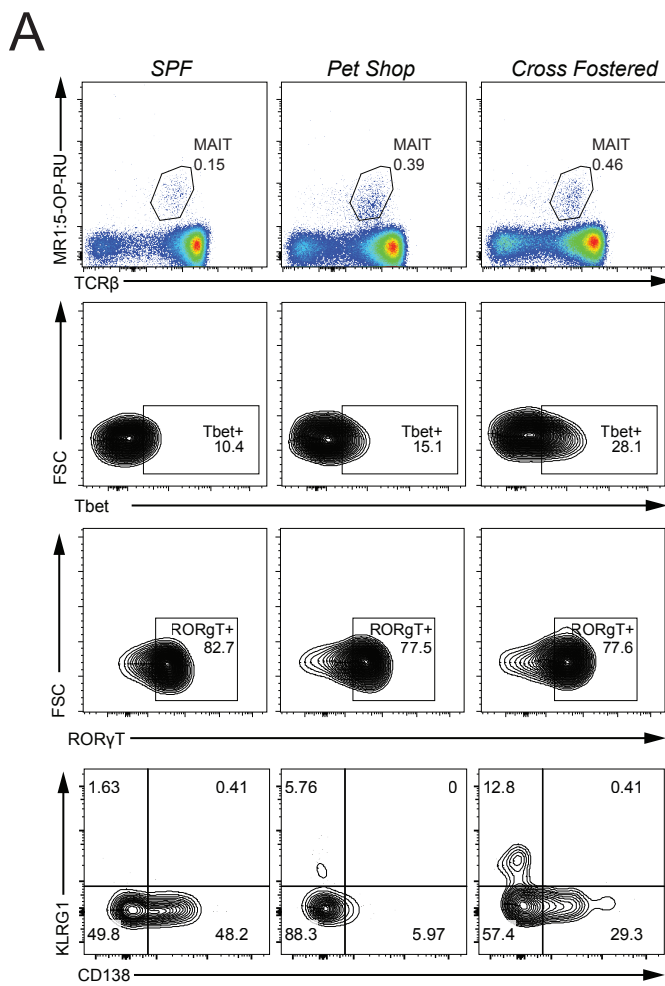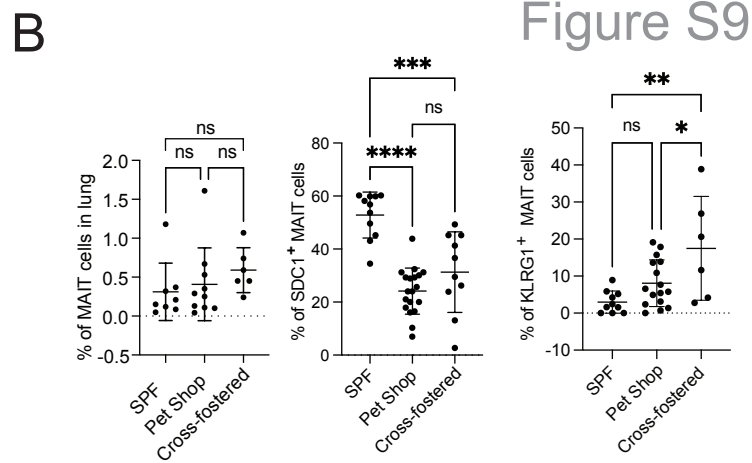

Figure S9

1482 **Figure S9: Altered MAIT cell phenotype in pet shop and cross-fostered mice.**

1483 (A) Representative flow cytometry plots from SPF, pet store and cross-fostered mice  
1484 showing percentage of lung MAIT cells, and the percentage of MAIT cells that expressed  
1485 the indicated proteins. (B) Cumulative data of lung MAIT cell protein expression analyzed  
1486 by one-way ANOVA with Tukey test displayed as mean $\pm$  S.D. SPF mice n = 8, Pet shop  
1487 mice n=10 and cross fostered mice n=6.

1488

1489

1490

1491

1492

1493

1494

1495

1496

1497

1498

1499

1500

1501

1502

1503

1504

A

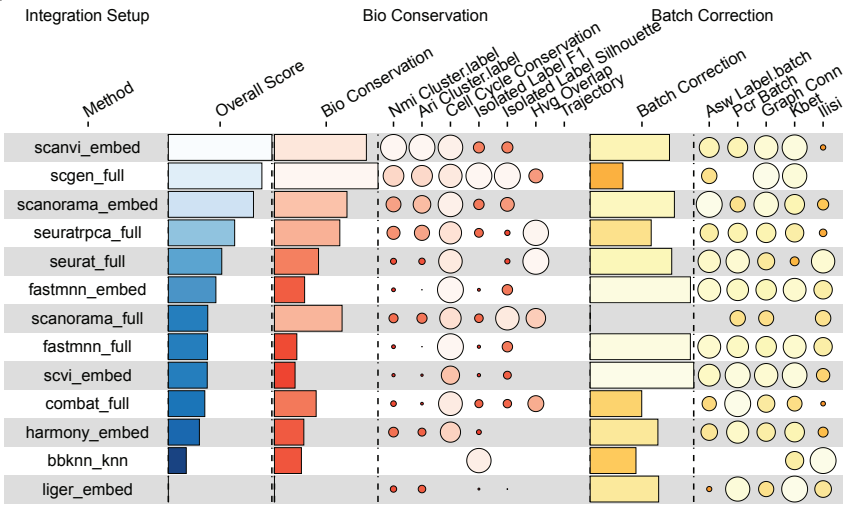

B

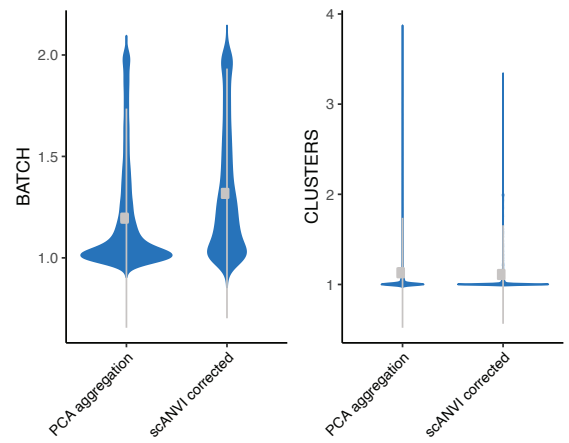

C

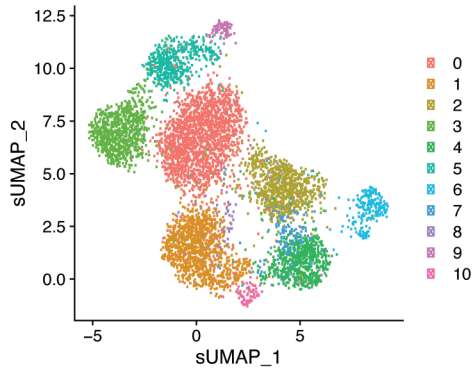

D

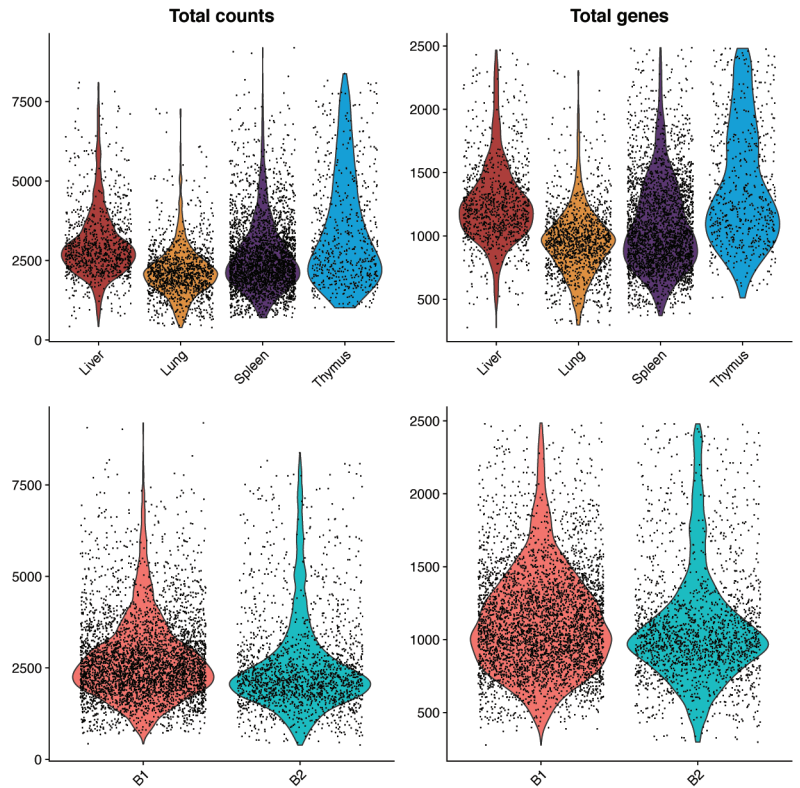

1505 **Figure S10: Batch effect correction and quality control of single cell libraries.**

1506 (A) Comparison of the performance of difference batch-effect correction methods.

1507 Performance metrics for conservation of biological changes and batch correction are

1508 indicated, as described (70). Overall scores are computed by a 40:60 weighted mean of

1509 these category scores, as described (70). scANVI method displayed best overall

1510 performance for our dataset. Color density indicates the ranking of the method, size of

1511 the circles the performance score. (B) Comparison of label conservation metrics obtained

1512 without (PCA-based aggregation shown in **Fig. 1A**) and with scANVI batch-effect

1513 correction. The distribution of local inverse Simpson's index (LISI) scores for the number

1514 of batches (*left*) and clusters (*right*). If major batch effect were present, then scANVI

1515 corrected LISI scores will show major differences from those obtained without correction.

1516 (C) Single-cell transcriptomes of mouse MAIT cells displayed by UMAP based on Seurat-

1517 based clustering of scANVI batch-effect corrected data displayed in **Fig. 1A** (without

1518 batch-effect correction). The color of the cells (dots) in the plot indicate their cluster

1519 annotations obtained without batch-effect correction. Cells from the original clusters also

1520 map onto distinct clusters in the batch-effect corrected clustering shown here. (D) Quality

1521 controls metrics of single-cell libraries from different organ and batches. Violin plots

1522 show the distribution of total UMI counts (*left*) and number of genes expressed in single

1523 cells (*right*) for the indicate batches and organs.

1524
